# Supplementary material for: Dissecting whole-brain conduction delays through MRI microstructural measures
Source: Springer Nature journal article supplement (doi:10.1007/s00429-021-02358-w), 2021-08-14
Supplement: MOESM1 [file 19570872]

## **Dissecting whole-brain conduction delays through MRI microstructural measures**

Matteo Mancini, Qiyuan Tian, Qiuyun Fan, Mara Cercignani, Susie Y. Huang

### **Supplementary material**

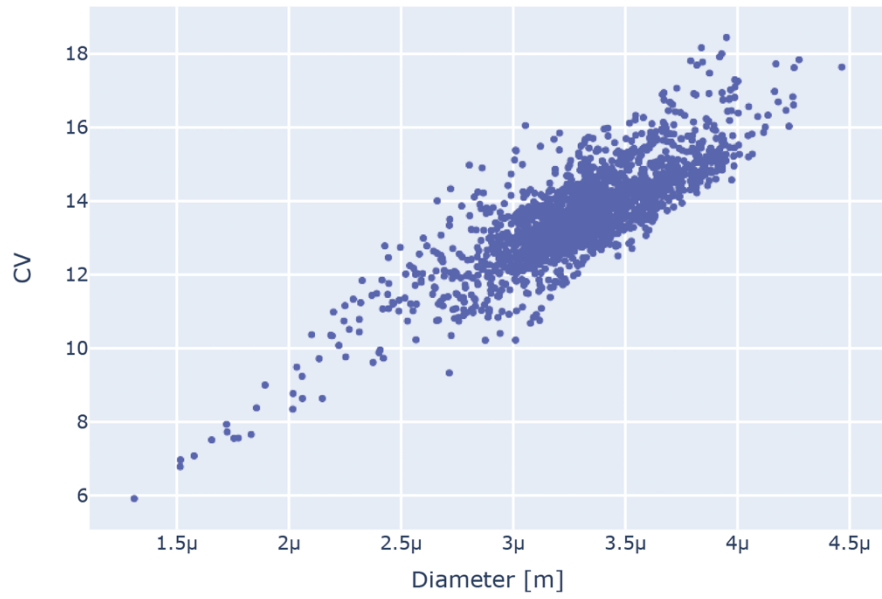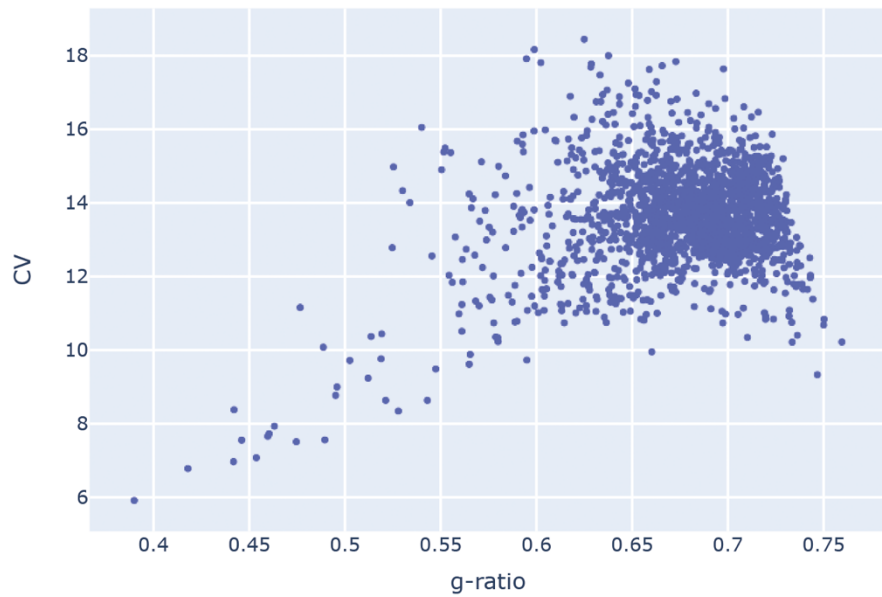

**Figure S1** Relationships between the conduction velocity and its main determinants: the axonal diameter (top) and the g-ratio (bottom). The diameter-CV relationship has an evident linear trend, while the g-ratio-CV one shares some similarities with the g-ratio-diameter trend (Figure 2).

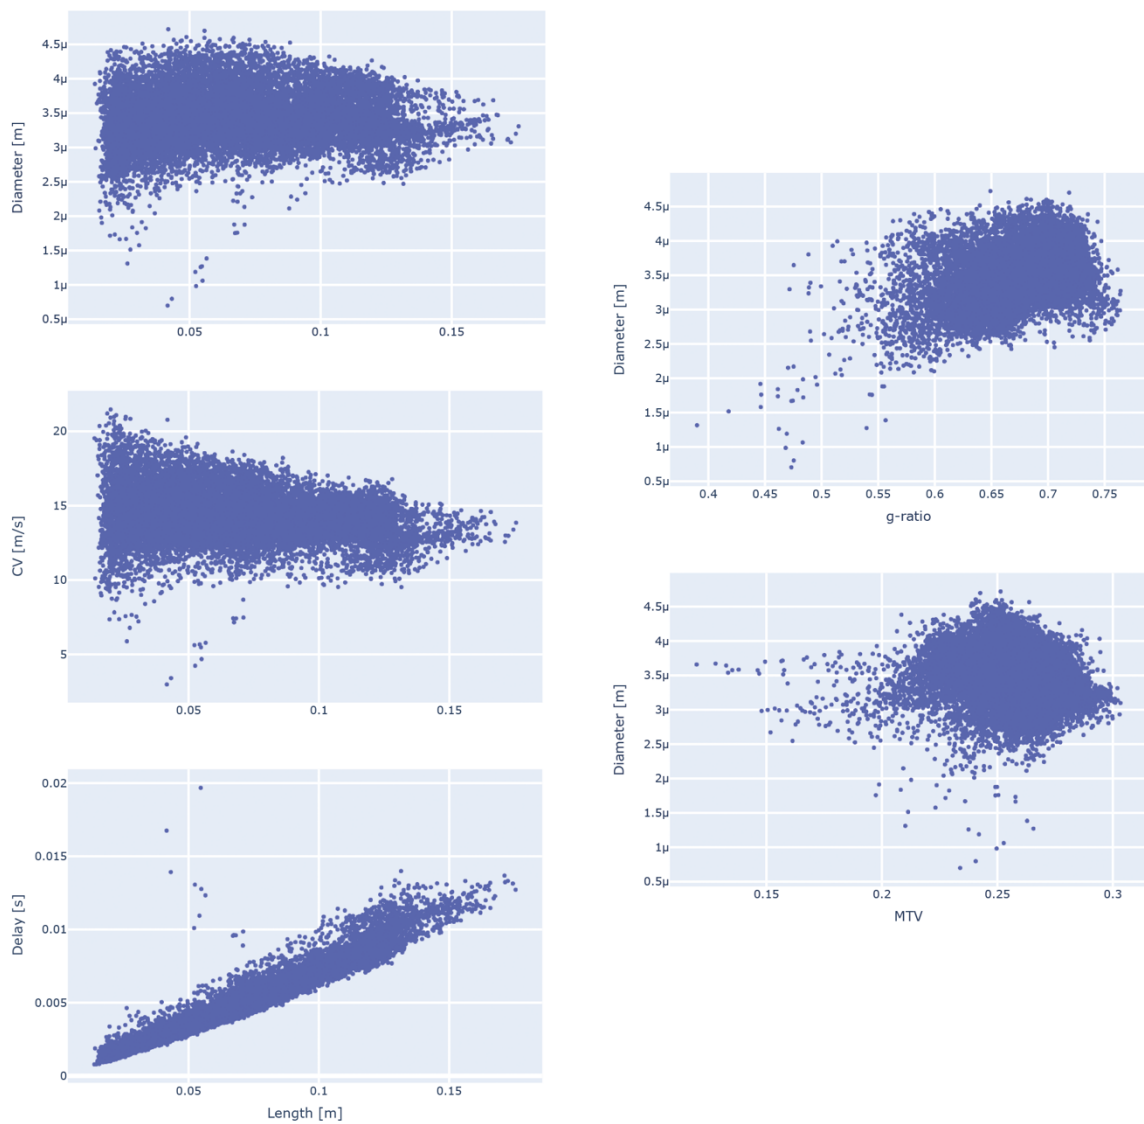

**Figure S2** Relationships between microstructural measures using the Lausanne atlas: on the left distributions of the axonal diameter (top), conduction velocity (middle) and delay (bottom) as a function of the connection length; on the right, axonal diameter distributions as a function of the g-ratio (top) and MTV (bottom). Each point in the scatterplots represents a connection in the group network.

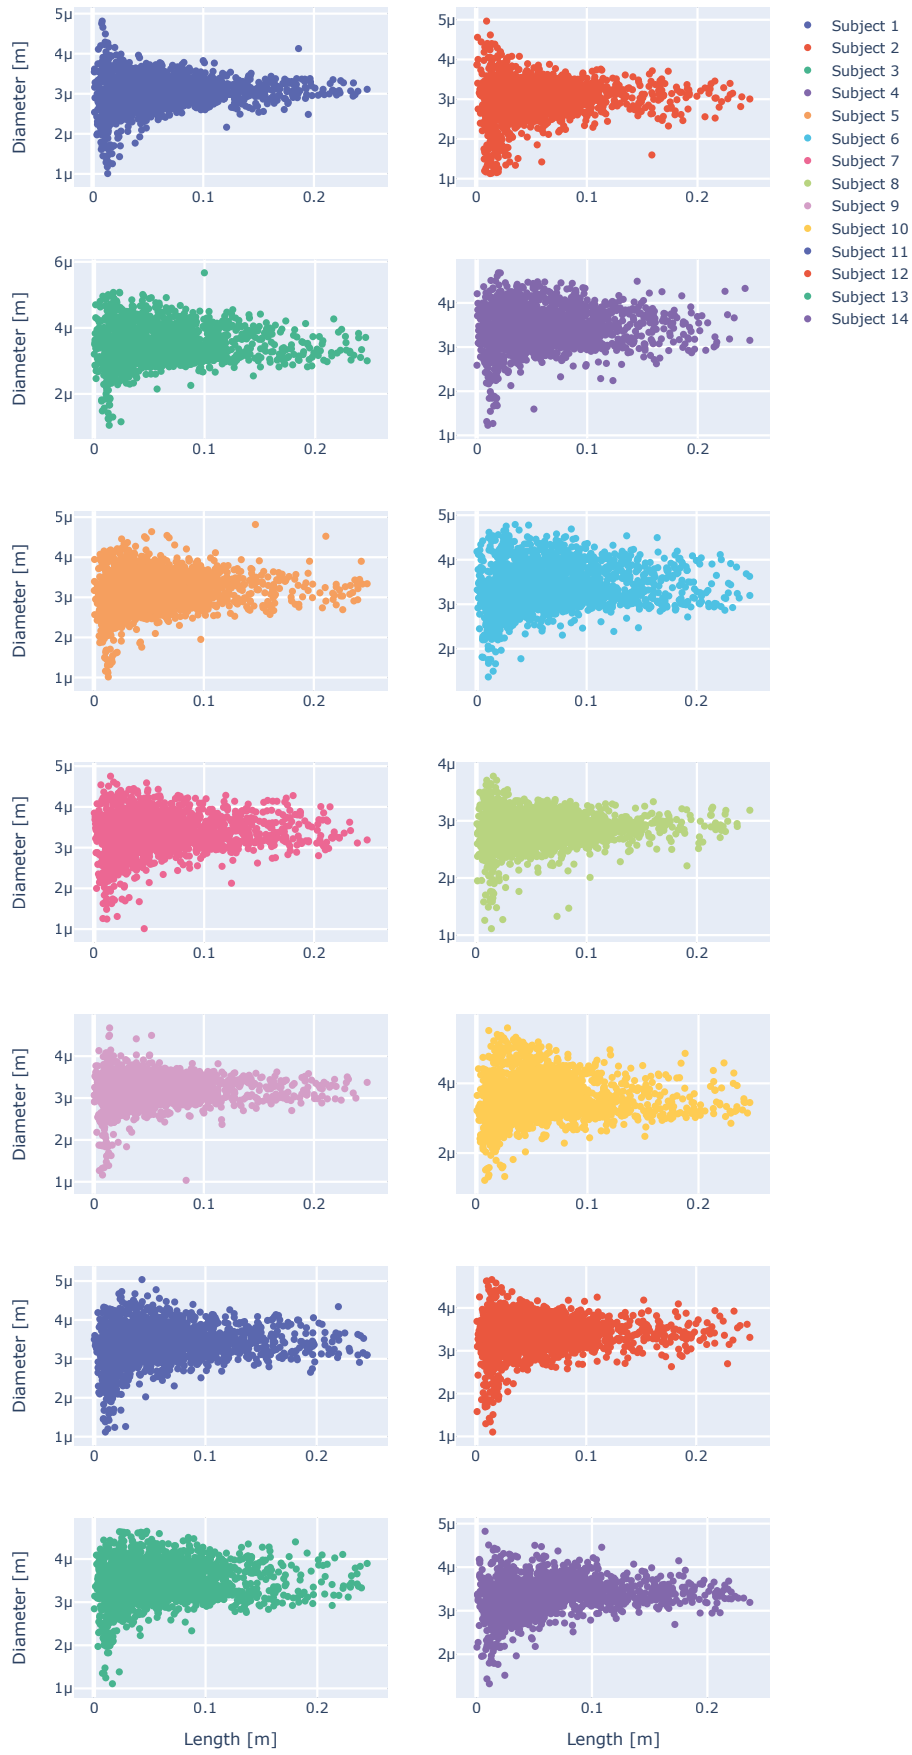

**Figure S3** Single-subject distribution of the axonal diameter distribution as a function of length.

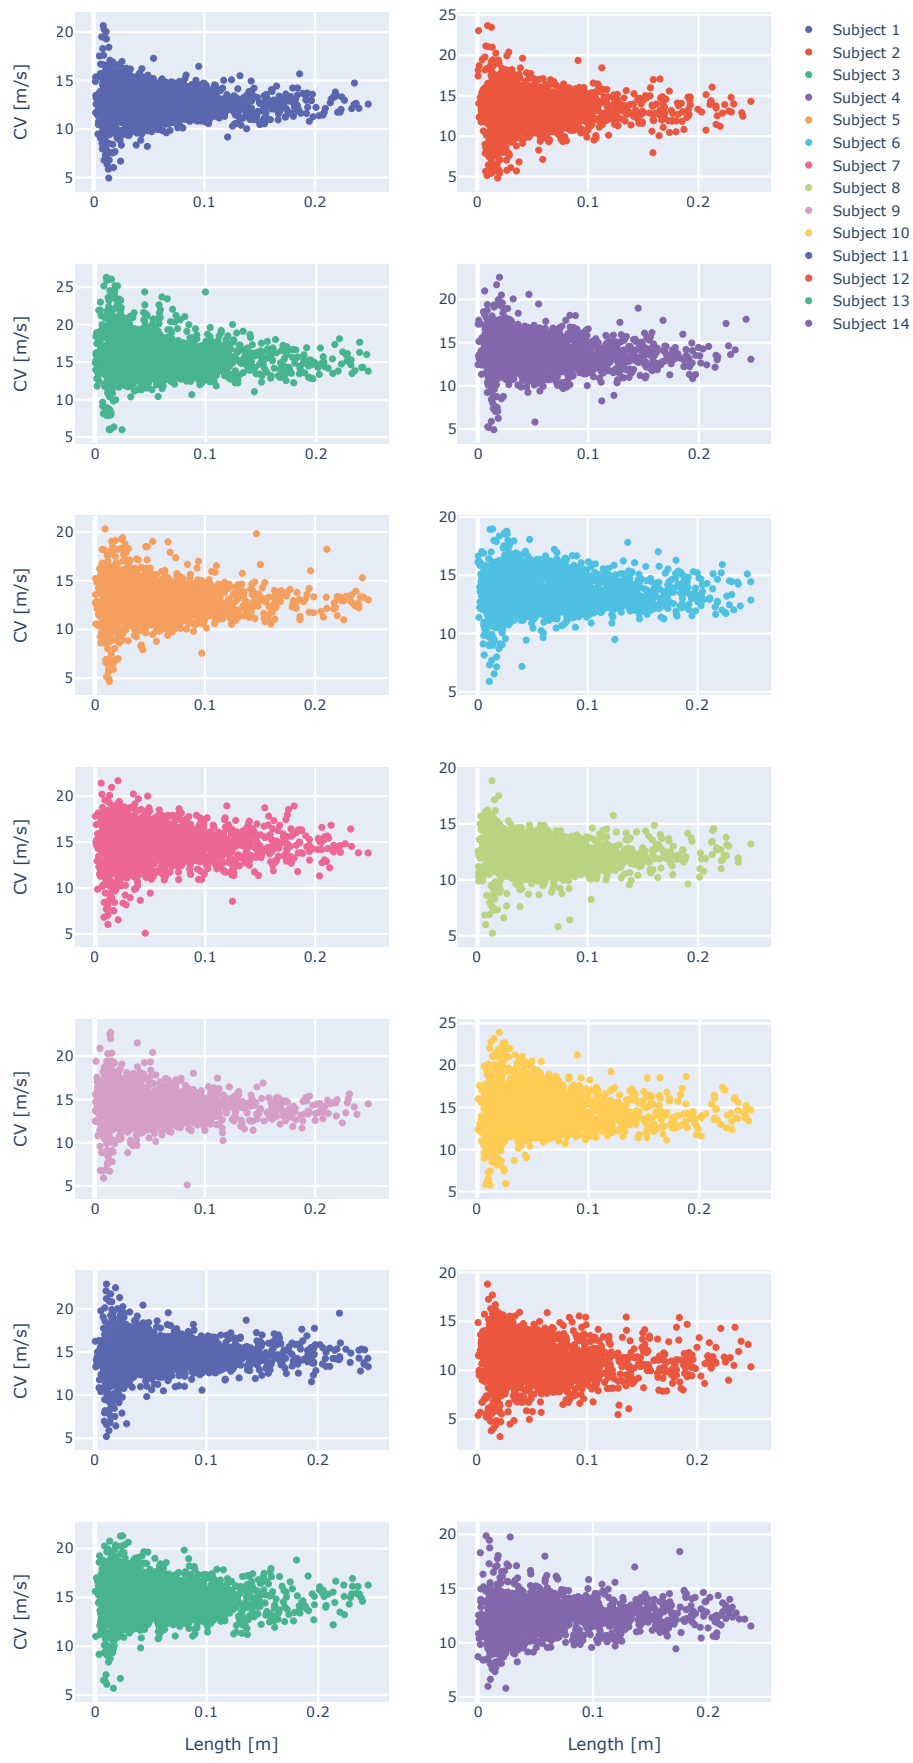

**Figure S4** Single-subject distribution of the conduction velocity distribution as a function of length.

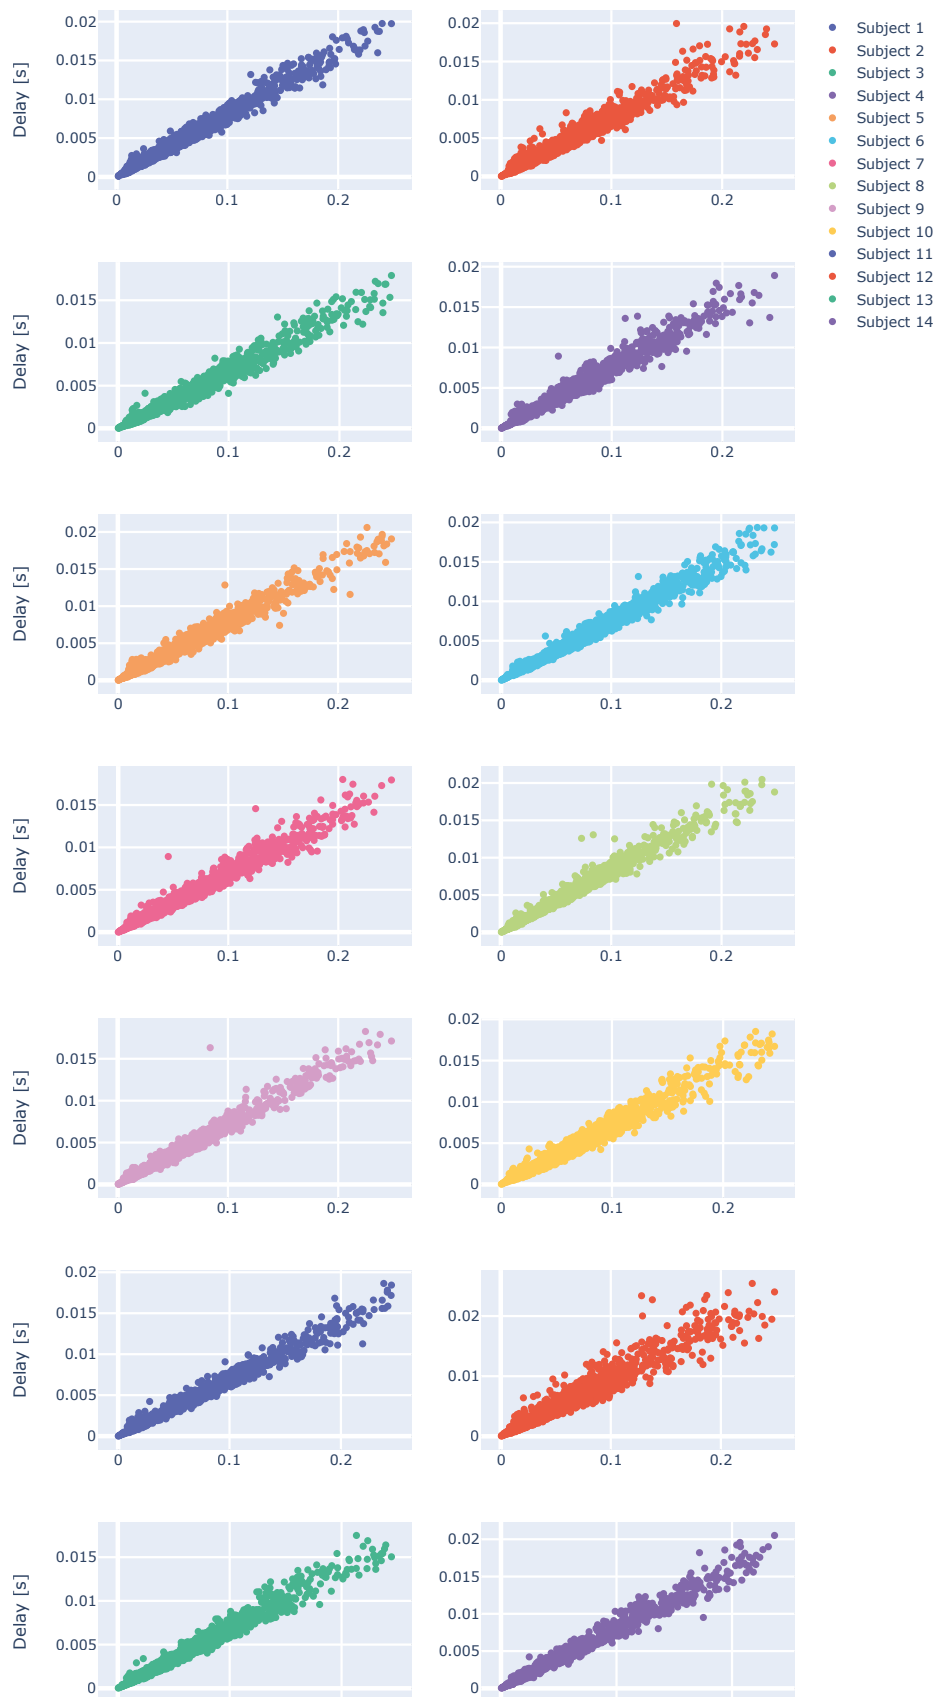

**Figure S5** Single-subject distribution of the conduction delay distribution as a function of length.

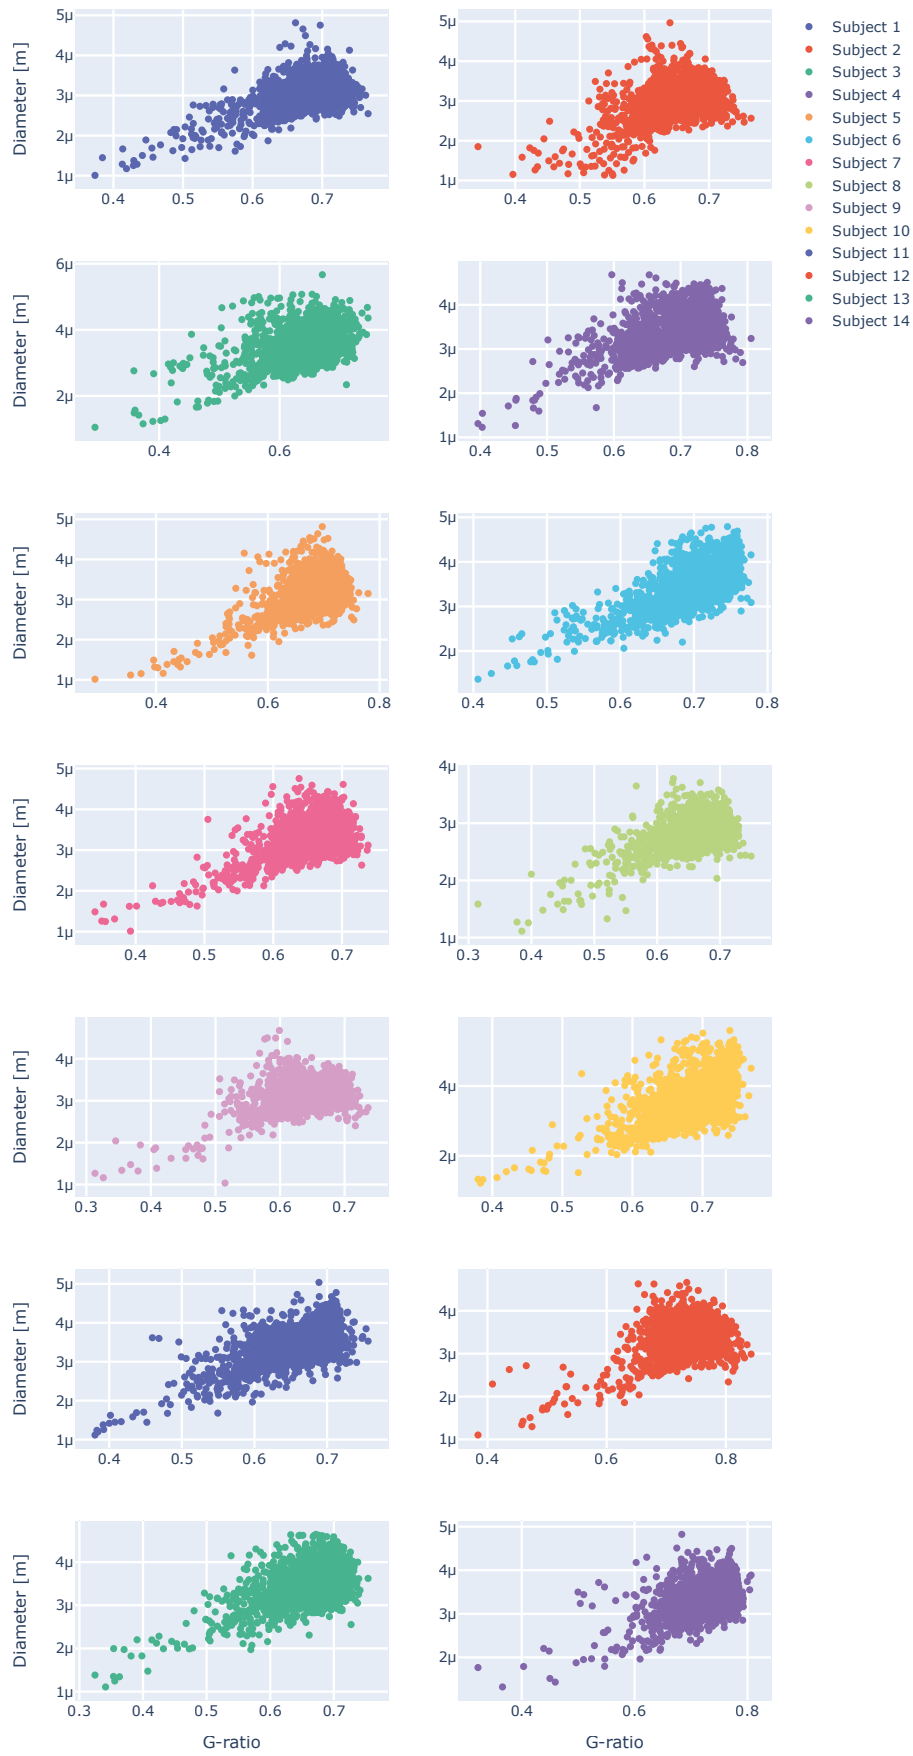

**Figure S6** Single-subject distribution of the axonal diameter distribution as a function of the g-ratio.

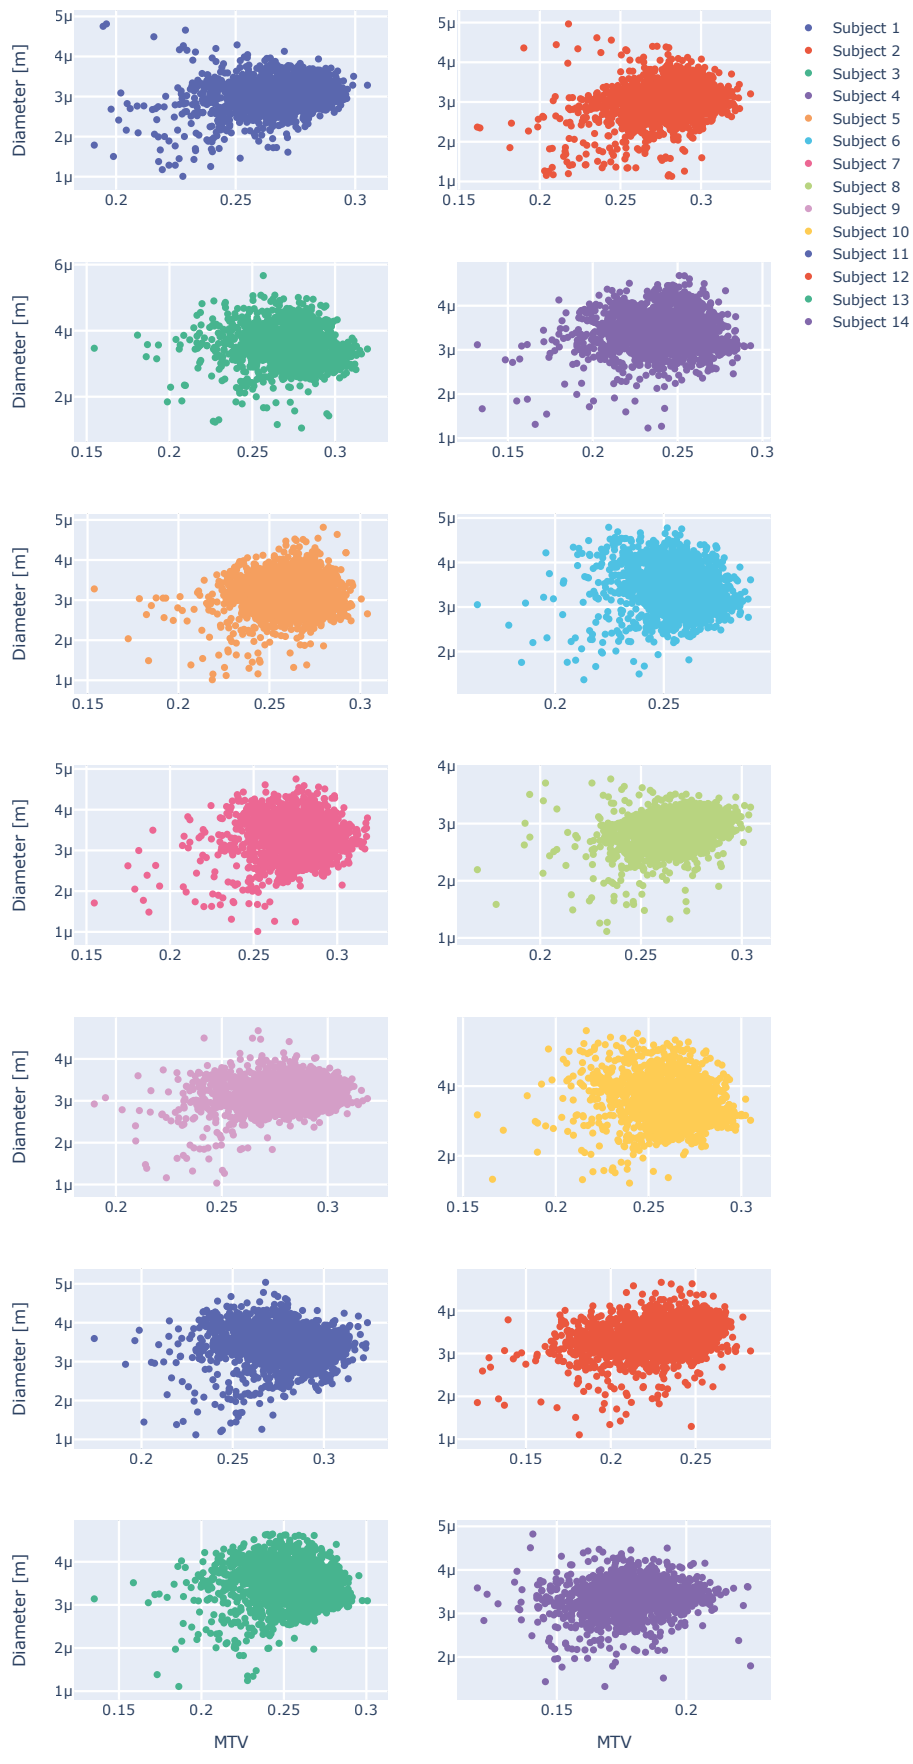

**Figure S7** Single-subject distribution of the axonal diameter distribution as a function of MTV.



**Table S1** List of FreeSurfer ROIs from the Desikan-Killiany atlas in the same order as in fig. 3.

| Cortical/Subcortical | Hemisphere | FreeSurfer label         |
|----------------------|------------|--------------------------|
| Cortical             | Left       | bankssts                 |
| Cortical             | Left       | caudalanteriorcingulate  |
| Cortical             | Left       | caudalmiddlefrontal      |
| Cortical             | Left       | cuneus                   |
| Cortical             | Left       | entorhinal               |
| Cortical             | Left       | fusiform                 |
| Cortical             | Left       | inferiorparietal         |
| Cortical             | Left       | inferiortemporal         |
| Cortical             | Left       | isthmuscingulate         |
| Cortical             | Left       | lateraloccipital         |
| Cortical             | Left       | lateralorbitofrontal     |
| Cortical             | Left       | lingual                  |
| Cortical             | Left       | medialorbitofrontal      |
| Cortical             | Left       | middletemporal           |
| Cortical             | Left       | parahippocampal          |
| Cortical             | Left       | paracentral              |
| Cortical             | Left       | parsopercularis          |
| Cortical             | Left       | parsorbitalis            |
| Cortical             | Left       | parstriangularis         |
| Cortical             | Left       | pericalcarine            |
| Cortical             | Left       | postcentral              |
| Cortical             | Left       | posteriorcingulate       |
| Cortical             | Left       | precentral               |
| Cortical             | Left       | precuneus                |
| Cortical             | Left       | rostralanteriorcingulate |
| Cortical             | Left       | rostralmiddlefrontal     |
| Cortical             | Left       | superiorfrontal          |
| Cortical             | Left       | superiorparietal         |
| Cortical             | Left       | superiortemporal         |
| Cortical             | Left       | supramarginal            |
| Cortical             | Left       | frontalpole              |
| Cortical             | Left       | temporalpole             |
| Cortical             | Left       | transversetemporal       |
| Cortical             | Left       | insula                   |
| Subcortical          | Left       | Thalamus-Proper          |
| Subcortical          | Left       | Caudate                  |
| Subcortical          | Left       | Putamen                  |
| Subcortical          | Left       | Pallidum                 |
| Subcortical          | Left       | Hippocampus              |
| Subcortical          | Left       | Amygdala                 |
| Subcortical          | Left       | Accumbens-area           |
| Subcortical          | Right      | Thalamus-Proper          |
| Subcortical          | Right      | Caudate                  |

|             |       |                          |
|-------------|-------|--------------------------|
| Subcortical | Right | Putamen                  |
| Subcortical | Right | Pallidum                 |
| Subcortical | Right | Hippocampus              |
| Subcortical | Right | Amygdala                 |
| Subcortical | Right | Accumbens-area           |
| Cortical    | Right | bankssts                 |
| Cortical    | Right | caudalanteriorcingulate  |
| Cortical    | Right | caudalmiddlefrontal      |
| Cortical    | Right | cuneus                   |
| Cortical    | Right | entoRightinal            |
| Cortical    | Right | fusiform                 |
| Cortical    | Right | inferiorparietal         |
| Cortical    | Right | inferiortemporal         |
| Cortical    | Right | isthmuscingulate         |
| Cortical    | Right | lateraloccipital         |
| Cortical    | Right | lateralorbitofrontal     |
| Cortical    | Right | lingual                  |
| Cortical    | Right | medialorbitofrontal      |
| Cortical    | Right | middletemporal           |
| Cortical    | Right | parahippocampal          |
| Cortical    | Right | paracentral              |
| Cortical    | Right | parsopercularis          |
| Cortical    | Right | parsorbitalis            |
| Cortical    | Right | parstriangularis         |
| Cortical    | Right | pericalcarine            |
| Cortical    | Right | postcentral              |
| Cortical    | Right | posteriorcingulate       |
| Cortical    | Right | precentral               |
| Cortical    | Right | precuneus                |
| Cortical    | Right | rostralanteriorcingulate |
| Cortical    | Right | rostralmiddlefrontal     |
| Cortical    | Right | superiorfrontal          |
| Cortical    | Right | superiorparietal         |
| Cortical    | Right | superiortemporal         |
| Cortical    | Right | supramarginal            |
| Cortical    | Right | frontalpole              |
| Cortical    | Right | temporalpole             |
| Cortical    | Right | transversetemporal       |
| Cortical    | Right | insula                   |
